# Supplementary material for: The Role of Coping Strategies in Post-Traumatic Growth among Syrian Refugees: A Structural Equation Model
Source: MDPI journal article supplement (doi:10.3390/ijerph18168829), 2021-08-21
Supplement: s1 [file s1]

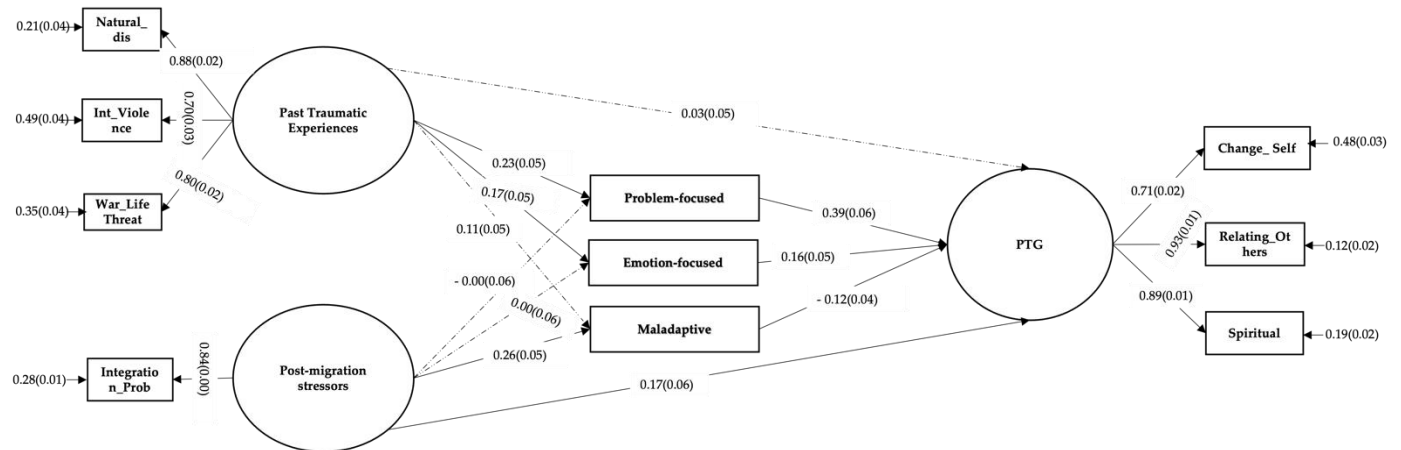

**Figure S1.** Structural equation model of PTG. Standardized coefficients are presented. Non-significant paths were shown with dotted lines. Natural\_dis = Natural disaster and accident, Int\_Violence = Interpersonal violence, War\_LifeThreat = Life-threatening Events-War, Integration\_Prob = Integration problems, Problemfocus= Problem-focused coping, Emotionfocus= Emotion-focused coping, Maladaptive= Maladaptive coping, PTG = Post-traumatic growth.
