# Supplementary material for: The Role of Coping Strategies in Post-Traumatic Growth among Syrian Refugees: A Structural Equation Model
Source: MDPI journal article supplement (doi:10.3390/ijerph18168829), 2021-08-21
Supplement: s1 [file s1]

**Table S1.** Descriptive statistics and bivariate correlations among study variables.

| Variable            | 1        | 2       | 3       | 4        | 5        | 6        | 7       | 8       | 9       | 10    | 11       | 12      | 13 |
|---------------------|----------|---------|---------|----------|----------|----------|---------|---------|---------|-------|----------|---------|----|
| 1. PTG-self         | -        |         |         |          |          |          |         |         |         |       |          |         |    |
| 2. PTG-spiritual    | 0.84 **  | -       |         |          |          |          |         |         |         |       |          |         |    |
| 3. PTG-relation     | 0.66 **  | 0.62 ** | -       |          |          |          |         |         |         |       |          |         |    |
| 4. Natural_dis      | 0.14 **  | 0.19 ** | 0.13 ** | -        |          |          |         |         |         |       |          |         |    |
| 5. Int_Violence     | 0.02     | 0.04    | 0.12 ** | 0.62 **  | -        |          |         |         |         |       |          |         |    |
| 6. War_lifethreat   | 0.13 **  | 0.19 ** | 0.08    | 0.71 **  | 0.57 **  | -        |         |         |         |       |          |         |    |
| 7. Integration prob | 0.08 *   | 0.21 ** | 0.12 ** | 0.22 **  | 0.19 **  | 0.17 **  | -       |         |         |       |          |         |    |
| 8. Problemfocus     | 0.46 **  | 0.46 ** | 0.41 ** | 0.21 **  | 0.16 **  | 0.22 **  | 0.04    | -       |         |       |          |         |    |
| 9. Emotionfocus     | 0.36 **  | 0.35 ** | 0.42 ** | 0.17 **  | 0.12 **  | 0.15 **  | 0.03    | 0.70 ** | -       |       |          |         |    |
| 10. Maladaptive     | 0.01     | 0.02    | 0.20 ** | 0.16 **  | 0.19 **  | 0.05     | 0.23 ** | 0.17 ** | 0.27 ** | -     |          |         |    |
| 11. Age             | -0.13 ** | -0.08 * | 0.02    | 0.02     | 0.06     | 0.02     | 0.04    | -0.01   | 0.06    | -0.04 | -        |         |    |
| 12. LOS             | 0.01     | -0.08   | 0.07    | -0.14 ** | -0.03    | -0.15 ** | -0.04   | 0.0     | 0.02    | 0.0   | 0.08 *   | -       |    |
| 13. Sex (1:F 2:M)   | 0.07     | 0.0     | 0.12 ** | -0.12 ** | -0.17 ** | -0.08    | 0.0     | 0.0     | 0.01    | -0.04 | -0.20 ** | -0.09 * | -  |
| <i>n</i>            | 528      | 528     | 528     | 528      | 528      | 528      | 528     | 528     | 528     | 528   | 525      | 515     |    |
| M                   | 3.05     | 3.05    | 2.39    | 1.97     | 1.62     | 1.93     | 1.78    | 2.97    | 3.01    | 2.19  | 35.6     | 65.98   |    |
| SD                  | 1.14     | 1.11    | 1.16    | 0.68     | 0.67     | 0.75     | 0.89    | 0.61    | 0.5     | 0.64  | 11.65    | 24.04   |    |
| Range               | 0–5      | 0–5     | 0–5     | 1–4      | 1–4      | 1–4      | 0–4     | 1–4     | 1–4     | 1–4   | 18–77    | 2–144   |    |
| Skewness            | 0.02     | -0.47   | -0.43   | 0.51     | 1.12     | 0.44     | 0.16    | -0.47   | -0.58   | 0.07  | 0.83     | -0.154  |    |
| Kurtosis            | -0.66    | -0.23   | -0.47   | -0.24    | 0.98     | -0.77    | -0.44   | 0.11    | 0.69    | -0.76 | 0.27     | -0.118  |    |

Note. \*  $p < 0.05$ , \*\*  $p < 0.001$ . PTG = Post-traumatic growth, Natural\_dis = Natural disaster and accident, Int\_Violence = Interpersonal violence, War\_LifeThreat = Life-threatening Events-War, Integration Prob = Integration problems, Problem-focus = Problem-focused coping, Emotionfocus = Emotion-focused coping, Maladaptive = Maladaptive coping, LOS = Length of stay, F= Female, M = Male.
